# Supplementary material for: Defective boron nitride nanosheets: an efficient non-metal catalyst for electrochemical reduction of NO to NH3
Source: Royal Society of Chemistry journal article supplement (doi:10.1039/d3nj03921h), 2023-01-01
Supplement: d3nj03921h1.pdf [file d3nj03921h1.pdf]

## Experimental Section

### Synthesis of D-BN

100 mg of as-received BN nanoplates were exfoliated to BN nanosheets in 50 mL of absolute ethyl alcohol under ultrasonication for 5 h. The obtained BN nanosheets were collected by centrifugation, washed three times with deionized water/ethanol and vacuum-dried overnight. The dried BN nanosheets were then subjected to Ar plasma treatment for 10 min in a plasma system (13.56 MHz) to obtain D-BN.

### Electrochemical experiment

Electrochemical measurements were conducted under ambient conditions on a CHI-760E electrochemical workstation. The graphite rod, Ag/AgCl, and CC-loaded catalyst served as the reference, counter, and working electrodes, respectively. All potentials were referenced to reversible hydrogen electrode (RHE) by  $E$  (V vs. RHE) =  $E$  (V vs. Ag/AgCl) + 0.198 V + 0.059 × pH. The electrocatalytic NORR measurements were conducted within a gas-tight H-cell, using NO-saturated 0.5 M Na<sub>2</sub>SO<sub>4</sub> electrolyte. Before NRR testing, the feeding gases were purified using two glass bubblers filled with 4 M KOH solution[1]. Furthermore, the cathodic compartment was flushed with Ar for a minimum of 30 minutes to eliminate any remaining oxygen. Throughout the NRR electrolysis process, a continuous flow of NO (99.9%) gas was introduced into the cathodic chamber at a rate of 20 mL min<sup>-1</sup>. Subsequent to an hour of electrolysis, both the aqueous and gaseous products were identified using colorimetric methods and gas chromatography (GC), respectively.

### Determination of NH<sub>3</sub>

The generated NH<sub>3</sub> was determined by an indophenol blue method[2]. Typically, 0.5 mL of electrolyte was extracted from the electrochemical reaction vessel and subsequently diluted tenfold with deionized water. Then 2 mL of diluted solution was removed into a clean vessel followed by sequentially adding NaOH solution (2 mL, 1 M) containing C<sub>7</sub>H<sub>6</sub>O<sub>3</sub> (5 wt.%) and C<sub>6</sub>H<sub>5</sub>Na<sub>3</sub>O<sub>7</sub> (5 wt.%), NaClO (1 mL, 0.05 M), and C<sub>5</sub>FeN<sub>6</sub>Na<sub>2</sub>O (0.2 mL, 1wt.%) aqueous solution. After incubation for 2 hours at room temperature. The mixed solution was measured in UV-Vis at 655 nm. The

concentration-absorbance curves were calibrated using a range of concentrations in a standard  $\text{NH}_4\text{Cl}$  solution. Subsequently, the  $\text{NH}_3$  yield rate and Faradaic efficiency ( $\text{FE}_{\text{NH}_3}$ ) were calculated using the following equation:

$$\text{NH}_3 \text{ yield} = (c \times V) / (17 \times t \times A) \quad (1)$$

Faradaic efficiency was calculated by the following equation:

$$\text{FE}_{\text{NH}_3} = (5 \times F \times c \times V) / (17 \times Q) \times 100\% \quad (2)$$

where  $c$  ( $\mu\text{g mL}^{-1}$ ) is the measured  $\text{NH}_3$  concentration,  $V$  (mL) is the volume of electrolyte in the cathode chamber,  $t$  (s) is the electrolysis time and  $A$  is the surface area of CC ( $1 \times 1 \text{ cm}^2$ ),  $F$  ( $96500 \text{ C mol}^{-1}$ ) is the Faraday constant,  $Q$  (C) is the total quantity of applied electricity.

### Determination of $\text{N}_2\text{H}_4$

$\text{N}_2\text{H}_4$  in electrolyte was quantitatively determined by a Watt and Chrisp method[3]. To prepare the coloring solution, a combination of 300 mL  $\text{C}_2\text{H}_5\text{OH}$ , 5.99 g  $\text{C}_9\text{H}_{11}\text{NO}$ , and 30 mL  $\text{HCl}$  was mixed. Subsequently, 5 mL of the coloring solution was introduced to 5 mL of the electrolyte. After the incubation for 20 min at room temperature, the mixed solution was subjected to UV-vis measurement using the absorbance at 455 nm wavelength. The concentration-absorbance curve is calibrated by a series of concentrations of standard  $\text{N}_2\text{H}_4$  solutions.

### Characterizations

X-ray diffraction (XRD) was performed on a Rigaku D/max 2400 diffractometer. Transmission electron microscopy (TEM) and selected area electron diffraction (SAED) were performed on a Tecnai G<sup>2</sup> F20 microscope. X-ray photoelectron spectroscopy (XPS) analysis was collected on a PHI 5702 spectrometer. Electron spin resonance (EPR) spectra were recorded on a Bruker EPR-300 spectrometer.

### Calculation details

Spin-polarized density functional theory (DFT) calculations were carried out using the Cambridge sequential total energy package (CASTEP) with projector augmented wave pseudopotentials. The Perdew-Burke-Ernzerhof (PBE) generalized gradient approximation (GGA) functional was used for the exchange-correlation potential. The van der Waals interaction was described by using the empirical

correction in Grimme's scheme (DFT+D). During the geometry optimization, the electron wave functions were expanded using plane waves with a cutoff energy of 470 eV. The convergence tolerance was set to be  $1.0 \times 10^{-5}$  eV for energy and  $0.02 \text{ eV \AA}^{-1}$  for force. The  $3 \times 3 \times 1$  Monkhorst-Pack mesh was used in Brillouin zone sampling. BN (001) was modeled by a  $2 \times 2$  supercell, and a vacuum region of  $15 \text{ \AA}$  was used to separate adjacent slabs.

The adsorption energy ( $\Delta E$ ) is defined as[4]

$$\Delta E = E_{\text{ads/slab}} - E_{\text{ads}} - E_{\text{slab}} \quad (3)$$

where  $E_{\text{ads/slab}}$ ,  $E_{\text{ads}}$  and  $E_{\text{slab}}$  are the total energies for adsorbed species on slab, adsorbed species and isolated slab, respectively.

The Gibbs free energy ( $\Delta G$ , 298 K) of reaction steps is calculated by[4]

$$\Delta G = \Delta E + \Delta ZPE - T\Delta S \quad (4)$$

where  $\Delta E$  is the adsorption energy,  $\Delta ZPE$  is the zero-point energy difference and  $T\Delta S$  is the entropy difference between the gas phase and adsorbed state.

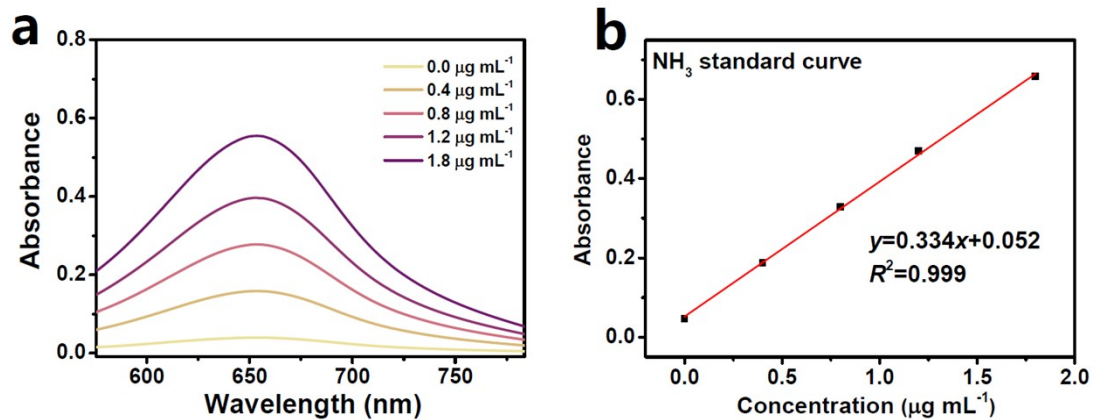

Fig. S1. (a) UV-vis absorption spectra of  $\text{NH}_4^+$  assays after incubated for 2 h at ambient conditions. (b) Calibration curve used for the calculation of  $\text{NH}_3$  concentrations.

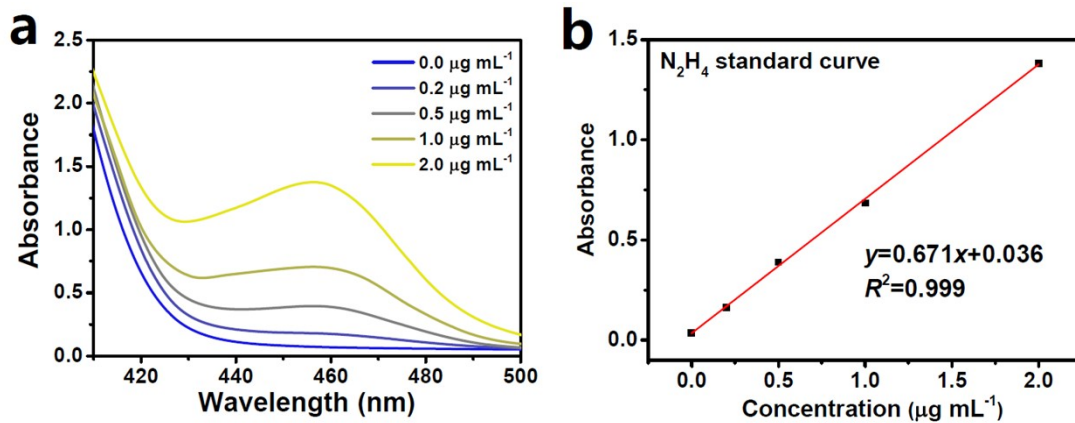

Fig. S2. (a) UV-vis absorption spectra of  $N_2H_4$  assays after incubated for 20 min at ambient conditions. (b) Calibration curve used for calculation of  $N_2H_4$  concentrations.

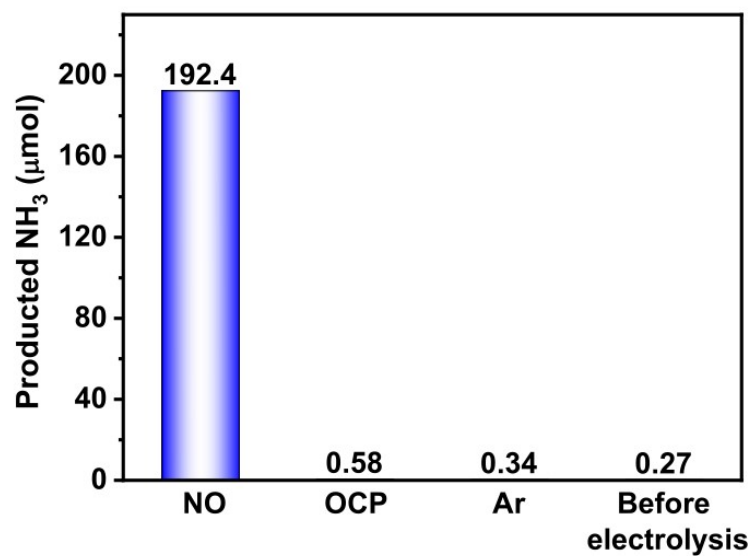

Fig. S3. Amounts of produced NH<sub>3</sub> over D-BN under different conditions: (1) electrolysis in NO-saturated solution at -0.7 V, (2) electrolysis in Ar-saturated solution at -0.7 V, (3) electrolysis in NO<sub>2</sub><sup>-</sup>-containing solution at open-circuit potential (OCP), (4) before electrolysis.

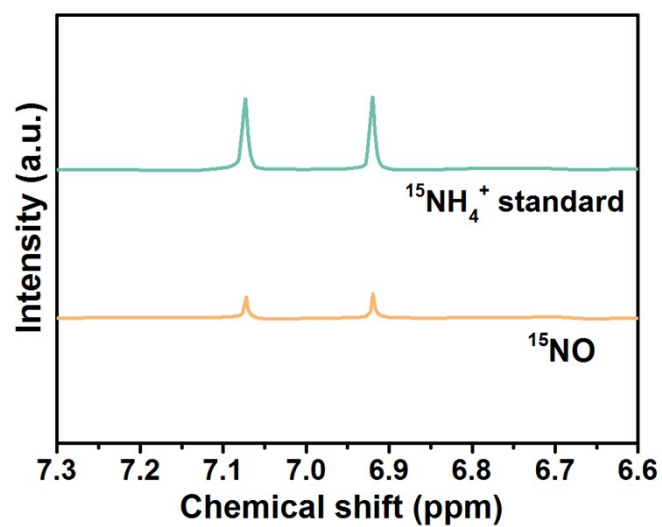

Fig. S4.  $^1\text{H}$  NMR spectra of  $^{15}\text{NH}_4^+$  standard sample and those fed by  $^{15}\text{NO}$  after NORR electrolysis on D-BN at -0.7 V

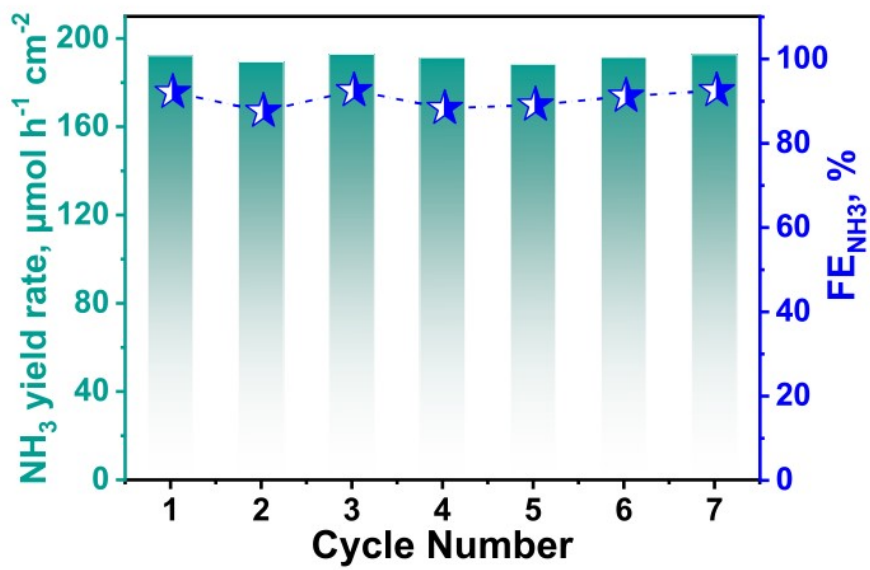

Fig. S5. Cycling test of D-BN at -0.7 V.



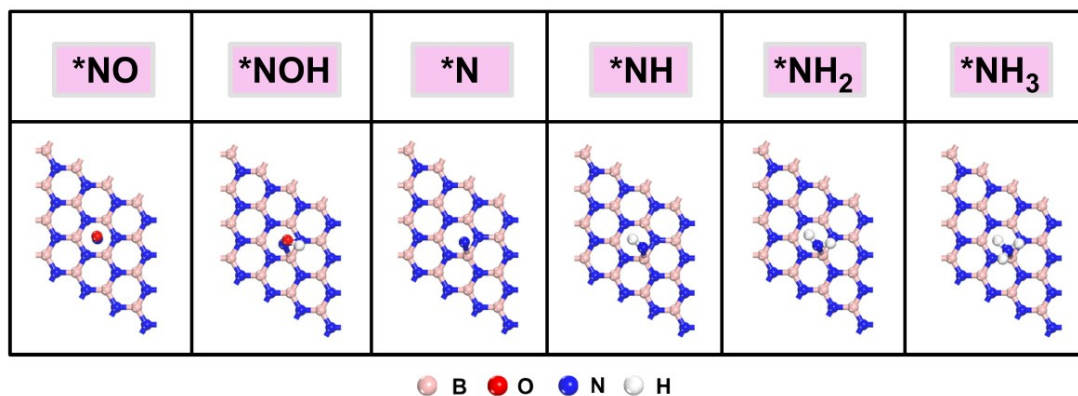

Fig. S6. Optimized structures of the reaction intermediates on pristine BN.

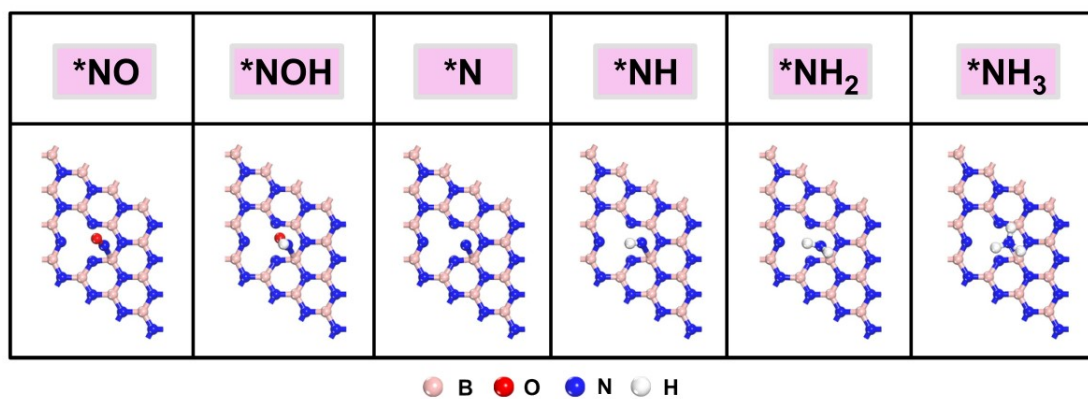

Fig. S7. Optimized structures of the reaction intermediates on D-BN.

Table S1. Comparison of the optimum NH<sub>3</sub> yield rate and NH<sub>3</sub>-Faradic efficiency (FE<sub>NH<sub>3</sub></sub>) for recently reported NORR electrocatalysts at ambient conditions.

| Catalyst                                           | Electrolyte                               | NH <sub>3</sub> yield rate (μmol h <sup>-1</sup> cm <sup>-2</sup> ) | FE <sub>NH<sub>3</sub></sub> (%) | Potential (V vs. RHE) | Ref.             |
|----------------------------------------------------|-------------------------------------------|---------------------------------------------------------------------|----------------------------------|-----------------------|------------------|
| NiO/TM                                             | 0.1 M Na <sub>2</sub> SO <sub>4</sub>     | 125.3                                                               | 90                               | -0.6                  | [5]              |
| Ni@NC                                              | 0.1 M HCl                                 | 34.6                                                                | 72.3                             | 0.16                  | [6]              |
| Bi NDs                                             | 0.1 M Na <sub>2</sub> SO <sub>4</sub>     | 70.2                                                                | 89.2                             | -0.5                  | [7]              |
| Cu <sub>2</sub> O@CoMN <sub>2</sub> O <sub>4</sub> | 0.1 M Na <sub>2</sub> SO <sub>4</sub>     | 94.18                                                               | 75.05                            | -0.9                  | [8]              |
| CoS <sub>1-x</sub>                                 | 0.2 M Na <sub>2</sub> SO <sub>4</sub>     | 44.67                                                               | 53.62                            | -0.4                  | [9]              |
| RuGa                                               | 0.1 M K <sub>2</sub> SO <sub>4</sub>      | 160.3                                                               | 72.3                             | -0.2                  | [10]             |
| NiFe-LDH                                           | 0.2 M Li <sub>2</sub> SO <sub>4</sub>     | 112                                                                 | 82                               | -0.7                  | [11]             |
| a-B <sub>2.6</sub> C@TiO <sub>2</sub> /Ti          | 0.1 M Na <sub>2</sub> SO <sub>4</sub>     | 216.4                                                               | 87.6                             | -0.9                  | [12]             |
| Ru <sub>0.05</sub> Cu <sub>0.95</sub>              | 0.05 M Na <sub>2</sub> SO <sub>4</sub>    | 17.68                                                               | 64.9                             | -0.5                  | [13]             |
| HCNF                                               | 0.2 M Na <sub>2</sub> SO <sub>4</sub>     | 22.35                                                               | 88.33                            | -0.6                  | [14]             |
| Ni <sub>2</sub> P/CP                               | 0.1 M HCl                                 | 33.47                                                               | 76.9                             | -0.2                  | [15]             |
| CoP/TM                                             | 0.2 M Na <sub>2</sub> SO <sub>4</sub>     | 47.22                                                               | 88.3                             | -0.2                  | [16]             |
| <b>D-BN</b>                                        | <b>0.5 M Na<sub>2</sub>SO<sub>4</sub></b> | <b>192.4</b>                                                        | <b>92.1</b>                      | <b>-0.7</b>           | <b>This work</b> |

## References

- [1]. L. Zhang, J. Liang, Y. Wang, T. Mou, Y. Lin, L. Yue, T. Li, Q. Liu, Y. Luo, N. Li, B. Tang, Y. Liu, S. Gao, A. A. Alshehri, X. Guo, D. Ma and X. Sun, *Angew. Chem. Int. Edit.*, 2021, **60**, 25263-25268.
- [2]. P. Li, Z. Jin, Z. Fang and G. Yu, *Energy Environ. Sci.*, 2021, **14**, 3522-3531.
- [3]. G. W. Watt and J. D. Chrisp, *Anal. Chem.*, 1952, **24**, 2006-2008.
- [4]. Y. Zhang, J. Xiang, K. Chen, Y.-L. Guo, D. Ma and K. Chu, *Chem. Commun.*, 2023, **59**, 8961-8964.
- [5]. P. Liu, J. Liang, J. Wang, L. Zhang, J. Li, L. Yue, Y. Ren, T. Li, Y. Luo, N. Li, B. Tang, Q. Liu, A. M. Asiri, Q. Kong and X. Sun, *Chem. Commun.*, 2021, **57**, 13562-13565.
- [6]. S. Sethuram Markandaraj, T. Muthusamy and S. Shanmugam, *Adv. Sci.*, 2022, **9**, 2201410.
- [7]. Y. Lin, J. Liang, H. Li, L. Zhang, T. Mou, T. Li, L. Yue, Y. Ji, Q. Liu, Y. Luo, N. Li, B. Tang, Q. Wu, M. S. Hamdy, D. Ma and X. Sun, *Mater. Today Phys.*, 2022, **22**, 100611.
- [8]. C. Bai, S. Fan, X. Li, Z. Niu, J. Wang, Z. Liu and D. Zhang, *Adv. Funct. Mater.*, 2022, **32**, 2205569.
- [9]. L. Zhang, Q. Zhou, J. Liang, L. Yue, T. Li, Y. Luo, Q. Liu, N. Li, B. Tang, F. Gong, X. Guo and X. Sun, *Inorg. Chem.*, 2022, **61**, 8096-8102.
- [10]. H. Zhang, Y. Li, C. Cheng, J. Zhou, P. Yin, H. Wu, Z. Liang, J. Zhang, Q. Yun, A.-L. Wang, L. Zhu, B. Zhang, W. Cao, X. Meng, J. Xia, Y. Yu and Q. Lu, *Angew. Chem. Int. Ed.*, 2023, **62**, e202213351.
- [11]. G. Meng, T. Wei, W. Liu, W. Li, S. Zhang, W. Liu, Q. Liu, H. Bao, J. Luo and X. Liu, *Chem. Commun.*, 2022, **58**, 8097-8100.
- [12]. J. Liang, P. Liu, Q. Li, T. Li, L. Yue, Y. Luo, Q. Liu, N. Li, B. Tang, A. A. Alshehri, I. Shakir, P. O. Agboola, C. Sun and X. Sun, *Angew. Chem. Int. Ed.*, 2022, **61**, e202202087.
- [13]. J. Shi, C. Wang, R. Yang, F. Chen, N. Meng, Y. Yu and B. Zhang, *Sci. China Chem.*, 2021, **64**, 1493-1497.
- [14]. L. Ouyang, Q. Zhou, J. Liang, L. Zhang, L. Yue, Z. Li, J. Li, Y. Luo, Q. Liu, N. Li, B. Tang, A. Ali Alshehri, F. Gong and X. Sun, *J. Colloid Interf. Sci.*, 2022, **616**, 261-267.
- [15]. T. Mou, J. Liang, Z. Ma, L. Zhang, Y. Lin, T. Li, Q. Liu, Y. Luo, Y. Liu, S. Gao, H. Zhao, A. M. Asiri, D. Ma and X. Sun, *J. Mater. Chem. A*, 2021, **9**, 24268-24275.
- [16]. J. Liang, W.-F. Hu, B. Song, T. Mou, L. Zhang, Y. Luo, Q. Liu, A. A. Alshehri, M. S. Hamdy, L.-M. Yang and X. Sun, *Inorg. Chem. Front.*, 2022, **9**, 1366-1372.
